# Supplementary material
Source: publisher site journal article supplement (https://www.dovepress.com/article/428938)
Supplement: Supplementary file 1 [file get_supplementary_file.php]

| Genes | Primer | Sequence |
| --- | --- | --- |
| ADAMTS-5 | Forward | GAACATCGACCAACTCTACTCCG |
| Reverse | CAATGCCCACCGAACCATCT |
| ACAN | Forward | CCCCTGCTATTTCATCGACCC |
| Reverse | GACACACGGCTCCACTTGAT |
| CD44 | Forward | CAACGCAGCAGAGTAATTCTCAGAG |
| Reverse | CCACCTGTGACATCATTCCTATTGC |
| MMP-13 | Forward | TTGAGCTGGACTCATTGTCG |
| Reverse | CGCGAGATTTGTAGGATGGT |
| Col2α1 | Forward | GAGTGGAAGAGCGGAGACTACTG |
| Reverse | CTCCATGTTGCAGAAGACTTTCA |

Table. S1 The primer sequence
